# Supplementary material for: Sorting things out: Assessing effects of unequal specimen biomass on DNA metabarcoding
Source: PubMed Central journal article supplement (PMC5587478; doi:10.1002/ece3.3192), 2017-07-28
Supplement: ECE3-7-6918-s001.pdf [file ECE3-7-6918-s001.pdf]

**a) Sample "P8"**

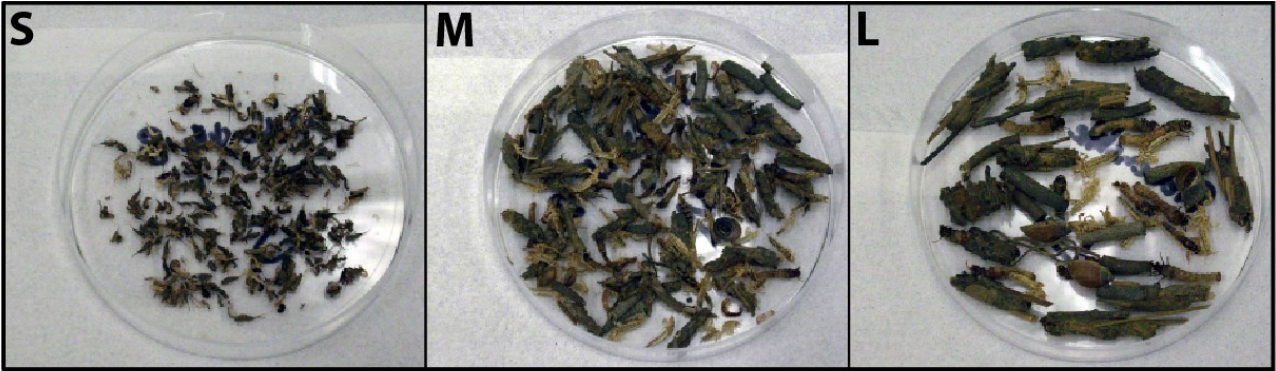

**b) Sample "P10"**

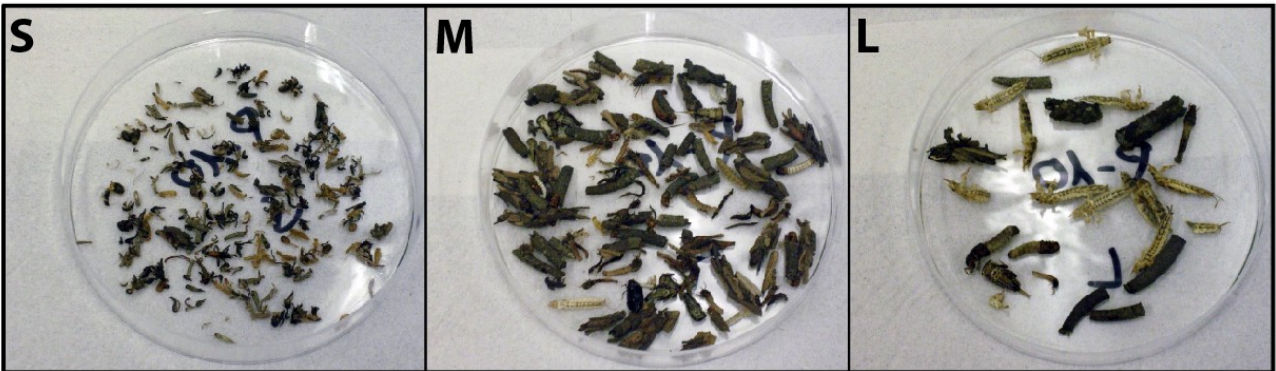

**c) Specimen sorting grid**

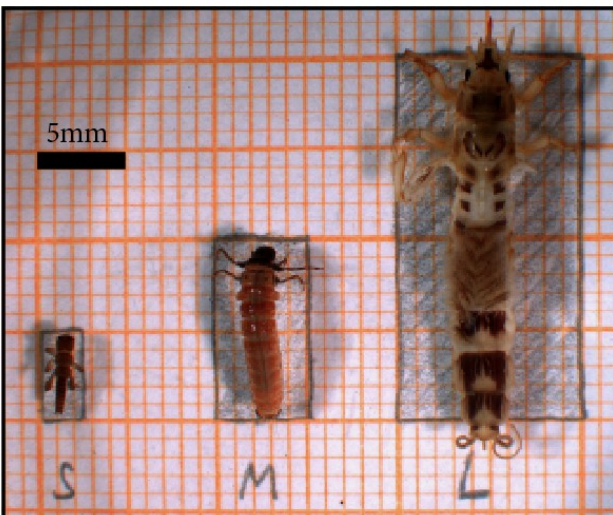

**Figure S1:** Overview of specimens from both sample sites (P8: **a**, P10: **b**) sorted by biomass into small (S), medium (M) and large (L) size categories using a sorting grid (**c**).
