# Supplementary material for: Sorting things out: Assessing effects of unequal specimen biomass on DNA metabarcoding
Source: PubMed Central journal article supplement (PMC5587478; doi:10.1002/ece3.3192), 2017-07-28
Supplement: ECE3-7-6918-s003.pdf [file ECE3-7-6918-s003.pdf]

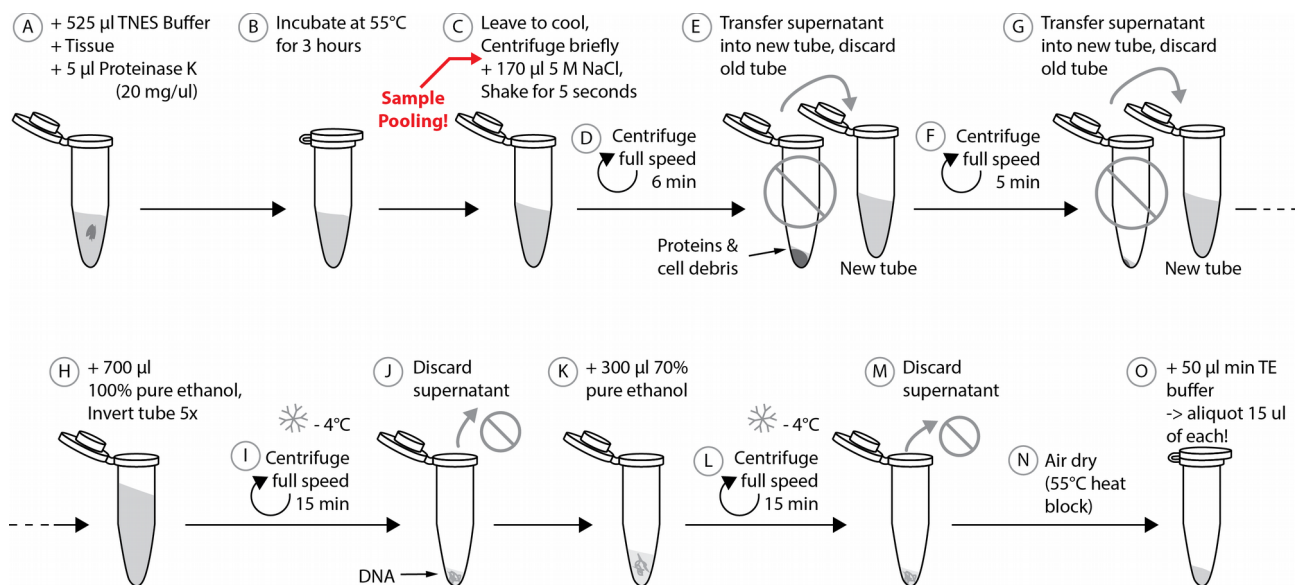

**Figure S3:** Modified salting out DNA extraction protocol (based on Sunnucks & Hales 1996). In step C digestion solution from S, M and L were used in the right proportion to create the sorted (So) and unsorted (Un) samples.

Reference: Sunnucks & Hales (1996). Numerous transposed sequences of mitochondrial cytochrome oxidase I-II in aphids of the genus *Sitobion* (Hemiptera: Aphididae). *Molecular biology and evolution* 13:510–524.

TNES buffer (Tris, NaCl, EDTA, SDS):  
 50 mM Tris, pH 7.5  
 400 mM NaCl  
 20 mM EDTA  
 0.5 % SDS

min TE buffer (pH 8)  
 10 mM Tris Base  
 0.1 mM EDTA
