# Supplementary material for: Sorting things out: Assessing effects of unequal specimen biomass on DNA metabarcoding
Source: PubMed Central journal article supplement (PMC5587478; doi:10.1002/ece3.3192), 2017-07-28
Supplement: ECE3-7-6918-s007.pdf [file ECE3-7-6918-s007.pdf]

| OTU      | Order (or coarser) | Family            | Genus           | Species        | Sample 8 |    |   | BF1+BR1 |      |      | BF1+BR2 |      |      | BF2+BR1 |      |      | BF2+BR2 |      |      | Sample 10 |      |      | BF1+BR1 |      |      | BF1+BR2 |      |      | BF2+BR1 |   |    | BF2+BR2 |   |   |
|----------|--------------------|-------------------|-----------------|----------------|----------|----|---|---------|------|------|---------|------|------|---------|------|------|---------|------|------|-----------|------|------|---------|------|------|---------|------|------|---------|---|----|---------|---|---|
|          |                    |                   |                 |                | S        | M  | L | S       | M    | L    | Un      | So   | S    | M       | L    | Un   | So      | S    | M    | L         | Un   | So   | S       | M    | L    | Un      | So   | S    | M       | L | Un | So      | S | M |
| OTU_120  | Trombidiformes     | Lebertidae        |                 |                |          |    |   | .020    | .010 | .004 |         |      |      | .008    | .007 | .005 |         |      |      | .009      | .020 | .007 |         |      |      | .007    | .022 | .006 |         |   |    |         |   |   |
| OTU_123  | Trombidiformes     | Arnyidae          |                 |                |          |    |   |         |      | .002 |         |      | .030 | .002    | .006 |      |         | .001 |      |           | .002 |      |         | .038 |      | .003    | .041 |      |         |   |    |         |   |   |
| OTU_117  | Trichoptera        | Sericostomatidae  | Oecismus        | monedula       |          |    |   | .017    | .003 | .006 |         |      | .019 | .001    | .034 |      |         | .014 |      |           | .005 | .027 |         | .024 |      | .003    | .021 |      |         |   |    |         |   |   |
| OTU_19   | Trichoptera        | Philopotamidae    | Wormaldia       | occipitalis    | 0        | 0  | 0 |         |      |      |         |      |      |         |      |      |         |      |      |           |      |      |         |      |      |         |      |      |         |   |    |         |   |   |
| OTU_14   | Trichoptera        | Sericostomatidae  | Sericostoma     | personatum     |          |    |   | .24     | .19  | .24  | .29     | .15  | .34  | .54     | .05  | .37  | .84     | .06  | .70  | .70       |      |      |         |      |      |         |      |      |         |   |    |         |   |   |
| OTU_2580 | Trichoptera        | Sericostomatidae  | Sericostoma     | personatum     | 20       | 2  | 0 | .003    | .001 | .003 | .003    | .005 |      | .010    | .003 | .010 | .006    |      | .011 |           |      |      |         |      |      |         |      |      |         |   |    |         |   |   |
| OTU_21   | Trichoptera        | Sericostomatidae  | Sericostoma     | baeticum       |          |    |   | .32     | .20  | .67  | .42     | .37  |      | .22     | .39  | .35  | .37     |      |      |           |      |      |         |      |      |         |      |      |         |   |    |         |   |   |
| OTU_153  | Trichoptera        | Sericostomatidae  | Sericostoma     |                |          |    |   | .030    | .004 | .020 |         |      | .016 |         | .012 |      |         | .034 | .005 | .004      | .025 |      |         | .030 | .004 | .020    |      |      |         |   |    |         |   |   |
| OTU_1432 | Trichoptera        | Limnephilidae     | Potamophylax    | cingulatus     |          |    |   |         |      |      |         |      |      |         |      |      |         |      |      |           |      |      |         |      |      |         |      |      |         |   |    |         |   |   |
| OTU_16   | Trichoptera        | Limnephilidae     | Potamophylax    | cingulatus     | 0        | 0  | 0 |         |      |      |         |      |      |         |      |      |         |      |      |           |      |      |         |      |      |         |      |      |         |   |    |         |   |   |
| OTU_1773 | Trichoptera        | Limnephilidae     | Potamophylax    | cingulatus     |          |    |   |         |      |      |         |      |      |         |      |      |         |      |      |           |      |      |         |      |      |         |      |      |         |   |    |         |   |   |
| OTU_48   | Trichoptera        | Polycentropodidae | Polycentropus   | kirgizicus     | 2        | 5  | 0 |         |      |      |         |      |      |         |      |      |         |      |      |           |      |      |         |      |      |         |      |      |         |   |    |         |   |   |
| OTU_38   | Trichoptera        | Polycentropodidae | Polycentropus   | flavomaculatus | 1        | 2  | 0 | .028    | .032 | .12  | .04     | .08  | .047 | .049    | .16  | .19  | .53     | .02  | .19  | .16       | .09  | .19  | .14     | .10  |      |         |      |      |         |   |    |         |   |   |
| OTU_412  | Trichoptera        | Polycentropodidae | Polycentropus   | flavomaculatus | 0        | 1  | 0 | .017    | .24  | .11  | .28     | .19  | .93  | .77     | .35  | .032 | .19     | .34  | .08  | .05       | .19  | .44  | .10     |      |      |         |      |      |         |   |    |         |   |   |
| OTU_4    | Trichoptera        | Philopotamidae    |                 |                | 0        | 0  | 0 |         |      |      |         |      |      |         |      |      |         |      |      |           |      |      |         |      |      |         |      |      |         |   |    |         |   |   |
| OTU_157  | Trichoptera        | Odontoceridae     | Odontocerum     | albicornis     | 0        | 1  | 1 | .35     | .43  | .58  | .45     | .16  | .39  | .50     | .45  | .53  | .11     | .44  | .35  | .47       | .14  | .58  | .40     |      |      |         |      |      |         |   |    |         |   |   |
| OTU_3353 | Trichoptera        | Limnephilidae     | Halesus         | radiatus       |          |    |   | .001    | .27  | 1.2  | .007    | .001 | .75  | .50     | .035 | .52  | .22     | .007 |      |           |      |      |         |      |      |         |      |      |         |   |    |         |   |   |
| OTU_6    | Trichoptera        | Limnephilidae     | Halesus         | radiatus       | 0        | 0  | 8 |         |      | .34  | .14     | .007 |      |         | .09  | .05  | .004    |      |      | .20       | .13  | .04  |         |      |      |         |      |      |         |   |    |         |   |   |
| OTU_20   | Trichoptera        | Limnephilidae     | Drusus          | annulatus      | 0        | 0  | 0 | .005    | .70  | .32  | .11     |      | .20  | .14     | .66  |      |         | .72  | .34  | .90       |      |      | .35     | .25  | .58  |         |      |      |         |   |    |         |   |   |
| OTU_32   | Trichoptera        | Polycentropodidae | Cyrrus          | trimaculatus   | 0        | 2  | 0 | .24     | .43  | .15  |         | .22  | .13  | .10     |      |      | .30     | .49  | .08  | .53       | .23  | .48  |         |      |      |         |      |      |         |   |    |         |   |   |
| OTU_4149 | Trichoptera        | Limnephilidae     | Chaetopteryx    | villosa        |          |    |   |         |      | .002 |         |      |      | .002    | .06  | .007 | .032    | .007 | .021 | .04       | .014 | .004 |         |      |      |         |      |      |         |   |    |         |   |   |
| OTU_6059 | Trichoptera        | Limnephilidae     | Chaetopteryx    | villosa        | 1        | 36 | 1 | .14     | .38  | .24  | .13     | .65  | .42  | .51     | .81  | .43  | .38     | .19  | .53  | .02       | .72  | .23  | .41     | .15  | .42  |         |      |      |         |   |    |         |   |   |
| OTU_99   | Trichoptera        | Limnephilidae     | Anomalopterygia | chauviniana    |          |    |   | .018    | .009 | .002 | .003    | .002 | .001 |         |      | .028 | .002    | .019 | .002 | .012      | .006 | .002 |         |      |      |         |      |      |         |   |    |         |   |   |
| OTU_217  | Symphyleona        | Dicytomidae       | Dicytomyia      | minuta         | 0        | 1  | 0 | .031    | .023 | .003 |         |      | .006 | .009    |      | .035 | .011    | .039 |      |           | .14  | .08  | .028    |      |      |         |      |      |         |   |    |         |   |   |
| OTU_205  | Rhynchobdellida    | Glossiphoniidae   | Helobdella      | stagnalis      | 0        | 1  | 0 |         |      |      |         |      | .013 | .001    | .017 | .005 |         |      | .023 | .012      |      | .014 | .004    |      |      |         |      |      |         |   |    |         |   |   |
| OTU_212  | Plecoptera         |                   |                 |                |          |    |   |         |      |      |         |      |      |         |      |      |         |      |      |           |      |      |         |      |      |         |      |      |         |   |    |         |   |   |
| OTU_291  | Plecoptera         | Perlodidae        |                 |                |          |    |   |         |      |      |         |      |      |         |      |      |         |      |      |           |      |      |         |      |      |         |      |      |         |   |    |         |   |   |
| OTU_375  | Plecoptera         | Perlodidae        | Diura           | nanseni        |          |    |   |         |      |      |         |      |      |         |      |      |         |      |      |           |      |      |         |      |      |         |      |      |         |   |    |         |   |   |
| OTU_49   | Plecoptera         | Perlodidae        | Diura           |                |          |    |   |         |      |      |         |      |      |         |      |      |         |      |      |           |      |      |         |      |      |         |      |      |         |   |    |         |   |   |
| OTU_1553 | Plecoptera         | Perlodidae        | Diura           |                |          |    |   |         |      |      |         |      |      |         |      |      |         |      |      |           |      |      |         |      |      |         |      |      |         |   |    |         |   |   |
| OTU_1249 | Plecoptera         | Leuctridae        |                 |                |          |    |   | .003    | .001 | .004 |         |      | .002 | .001    |      | .006 | .013    | .040 | .041 |           | .011 | .024 |         |      |      |         |      |      |         |   |    |         |   |   |
| OTU_1641 | Plecoptera         | Leuctridae        |                 |                |          |    |   |         |      |      |         |      |      |         |      |      |         |      |      |           |      |      |         |      |      |         |      |      |         |   |    |         |   |   |
| OTU_43   | Plecoptera         | Chloroperlidae    | Siphonoperla    | torrentium     | 0        | 0  | 0 |         |      |      |         |      |      |         |      |      |         |      |      |           |      |      |         |      |      |         |      |      |         |   |    |         |   |   |
| OTU_5    | Plecoptera         | Nemouridae        | Protonemura     | auberti        | 0        | 0  | 0 |         |      |      |         |      |      |         |      |      |         |      |      |           |      |      |         |      |      |         |      |      |         |   |    |         |   |   |
| OTU_175  | Plecoptera         | Nemouridae        | Nemoura         | avicularis     | 1        | 0  | 0 | .018    | .001 | .011 |         | .009 | .001 | .011    |      | .002 | .002    | .006 | .003 |           | .004 |      |         |      |      |         |      |      |         |   |    |         |   |   |
| OTU_13   | Plecoptera         | Leuctridae        | Leuctra         | braueri        | 0        | 0  | 0 |         |      |      |         |      |      |         |      |      |         |      |      |           |      |      |         |      |      |         |      |      |         |   |    |         |   |   |
| OTU_27   | Plecoptera         | Leuctridae        | Leuctra         | fuscata        |          |    |   | .056    | .10  | .72  | .46     | .042 | .55  |         |      | .34  | .002    | .46  | .32  | .32       |      | .34  | .33     |      |      |         |      |      |         |   |    |         |   |   |
| OTU_88   | Plecoptera         | Leuctridae        | Leuctra         | digitata       |          |    |   | .009    | .009 | .009 | .007    | .006 | .007 |         |      | .030 | .027    | .029 | .20  |           |      |      |         |      |      |         |      |      |         |   |    |         |   |   |
| OTU_73   | Plecoptera         | Leuctridae        | Leuctra         | aurita         | 61       | 0  | 0 |         |      |      |         |      |      |         |      |      |         |      |      |           |      |      |         |      |      |         |      |      |         |   |    |         |   |   |
| OTU_41   | Plecoptera         | Leuctridae        | Leuctra         | albida         |          |    |   | .26     | .032 | .005 | .32     | .22  | .006 | .050    | .14  |      |         | .14  | .21  | .25       | 1.00 |      |         |      |      |         |      |      |         |   |    |         |   |   |
| OTU_67   | Plecoptera         | Leuctridae        | Leuctra         |                | 0        | 0  | 0 |         |      |      |         |      |      |         |      |      |         |      |      |           |      |      |         |      |      |         |      |      |         |   |    |         |   |   |
| OTU_220  | Pholidina          | Pholididae        |                 |                |          |    |   |         |      |      |         |      |      |         |      |      |         |      |      |           |      |      |         |      |      |         |      |      |         |   |    |         |   |   |
| OTU_114  | Odonata            | Cordulegasteridae | Cordulegaster   | boltonii       | 9        | 0  | 0 | .011    | .003 | .030 |         | .010 | .001 | .017    |      | .005 | .005    | .047 | .028 |           | .004 | .029 |         |      |      |         |      |      |         |   |    |         |   |   |
| OTU_152  | Odonata            | Calopterygidae    | Calopteryx      | maculata       | 1        | 0  | 1 |         |      |      |         | .003 | .003 | .013    |      | .003 |         |      | .032 |           | .006 | .021 |         |      |      |         |      |      |         |   |    |         |   |   |
| OTU_1067 | Lumbriculida       |                   |                 |                |          |    |   | .006    | .001 | .003 |         | .001 | .003 |         | .016 | .007 |         | .006 |      | .003      |      |      |         |      |      |         |      |      |         |   |    |         |   |   |
| OTU_130  | Lumbriculida       |                   |                 |                |          |    |   | .030    | .001 | .028 |         | .006 | .017 |         | .026 | .013 |         | .008 |      | .009      |      |      |         |      |      |         |      |      |         |   |    |         |   |   |
| OTU_162  | Lumbriculida       |                   |                 |                |          |    |   | .010    | .011 |      | .006    | .002 | .006 |         | .029 | .002 | .011    |      | .014 |           | .002 | .016 |         |      |      |         |      |      |         |   |    |         |   |   |
| OTU_4070 | Lumbriculida       | Lumbriculidae     | Styolnrius      | heringianus    |          |    |   | .008    | .006 | .008 | .025    | .001 | .032 |         | .008 | .007 | .005    | .038 |      | .005      | .027 |      |         |      |      |         |      |      |         |   |    |         |   |   |
| OTU_75   | Lumbriculida       | Lumbriculidae     | Styolnrius      | heringianus    |          |    |   | .021    | .008 | .017 | .025    | .001 | .031 |         | .021 | .020 | .009    | .037 |      | .004      | .027 |      |         |      |      |         |      |      |         |   |    |         |   |   |
| OTU_28   | Lumbriculida       | Lumbriculidae     | Styolnrius      | heringianus    |          |    |   | .015    | .010 | .021 | .050    | .003 | .006 |         | .017 | .014 | .013    | .008 |      | .008      | .006 |      |         |      |      |         |      |      |         |   |    |         |   |   |
| OTU_54   | Lumbriculida       | Lumbriculidae     | Lumbriculus     | variegatus     |          |    |   | .69     | .26  | .43  | .17     | .07  | .19  |         | .25  | .27  | .14     | .82  |      | .14       | .78  |      |         |      |      |         |      |      |         |   |    |         |   |   |
| OTU_17   | Lumbriculida       | Lumbriculidae     | Lumbriculus     |                |          |    |   | .10     | .04  | .14  | .11     | .004 | .19  |         | .18  | .12  | .15     | .20  |      | .17       | .21  |      |         |      |      |         |      |      |         |   |    |         |   |   |
| OTU_69   | Lumbriculida       | Lumbriculidae     | Lumbriculus     |                | 1        | 0  | 0 |         |      |      |         |      |      |         |      |      |         |      |      |           |      |      |         |      |      |         |      |      |         |   |    |         |   |   |
| OTU_272  | Hymenoptera        |                   |                 |                |          |    |   |         |      |      |         |      |      |         |      |      |         |      |      |           |      |      |         |      |      |         |      |      |         |   |    |         |   |   |
| OTU_160  | Hymenoptera        | Formicidae        | Myrmica         | ruginodis      |          |    |   |         |      |      |         |      |      |         |      |      |         |      |      |           |      |      |         |      |      |         |      |      |         |   |    |         |   |   |
| OTU_159  | Hymenoptera        | Formicidae        | Formicidae      |                | 0        | 1  | 3 | .060    | .94  | .39  | .23     | .16  | .80  | .38     | .37  |      | .005    |      | .008 | .001      |      |      |         |      |      |         |      |      |         |   |    |         |   |   |
