# Supplementary material for: Sorting things out: Assessing effects of unequal specimen biomass on DNA metabarcoding
Source: PubMed Central journal article supplement (PMC5587478; doi:10.1002/ece3.3192), 2017-07-28
Supplement: ECE3-7-6918-s009.pdf [file ECE3-7-6918-s009.pdf]

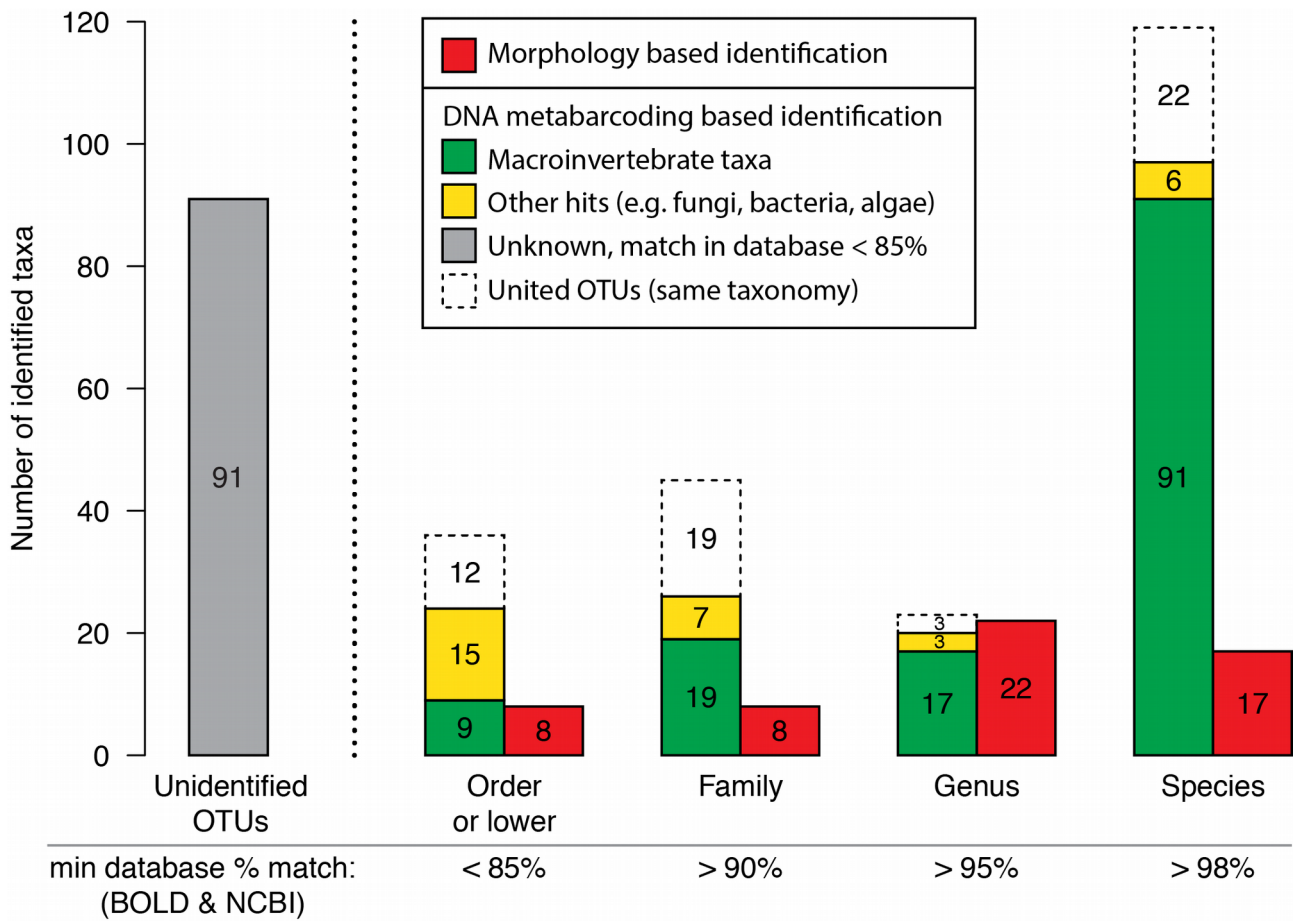

**Figure S9:** Comparison of macroinvertebrate taxa identified by DNA metabarcoding and morphological determination on different taxonomic levels. Below the bars the minimum required % match of the reference sequences required for sorting sequences into the respective category. OTUs with the same taxonomic hits in the reference database were merged into one single hit.
